# Supplementary material for: Effects of Exercise and Omega-3-Supplemented, High-Protein Diet on Inflammatory Markers in Serum, on Gene Expression Levels in PBMC, and after Ex Vivo Whole-Blood LPS Stimulation in Old Adults
Source: MDPI journal article supplement (doi:10.3390/ijms24020928), 2023-01-04
Supplement: s1 [file s1]

Supplementary figures and tables to:

Haß *et al.*, Effects of exercise and omega-3-supplemented, high-protein diet on inflammatory markers in serum, on gene expression levels in PBMC, and after ex vivo whole-blood LPS stimulation in old adults

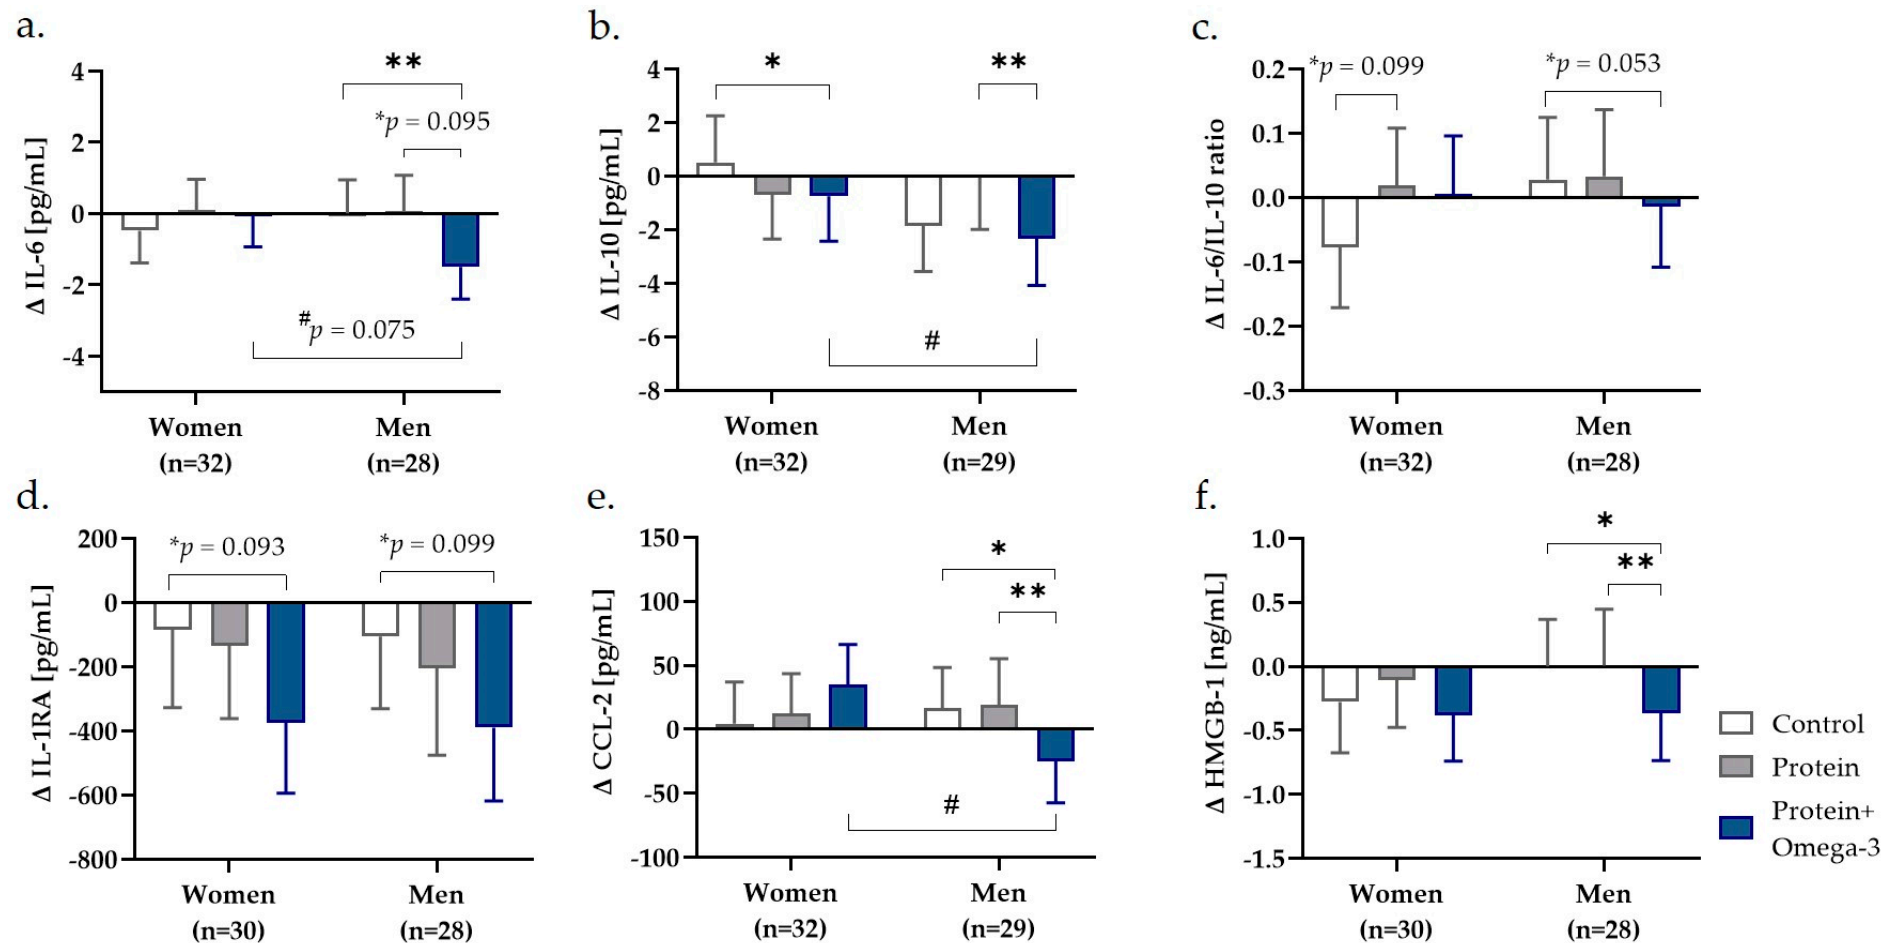

**Figure S1.** Delta ( $\Delta$ ) of serum concentrations of (a) IL-6, (b) IL-10, (c) IL-6/IL-10 ratio, (d) IL-1RA, (e) CCL-2, and (f) HMGB-1 presented as estimated mean with 95% confidence interval after eight weeks of control, high-protein (protein) or high-protein, omega-3-enriched (protein + omega-3) diet, displayed separately for women and men. Please note: Changes are shown as absolute values, but have been log-transformed before analyses. \*  $p < 0.05$ , \*\*  $p < 0.01$  obtained from generalized linear mixed models with random effects on subjects, adjusted for age and fat mass index to compare intervention effects within sex. #  $p < 0.05$  obtained from comparisons of group-specific changes between sex with either unpaired t-test or Mann-Whitney U test. CCL-2 c-c motif chemokine ligand-2; HMGB-1 high-mobility group box-1; IL interleukin, RA receptor antagonist.

Supplementary figures and tables to:

Haß *et al.*, Effects of exercise and omega-3-supplemented, high-protein diet on inflammatory markers in serum, on gene expression levels in PBMC, and after ex vivo whole-blood LPS stimulation in old adults

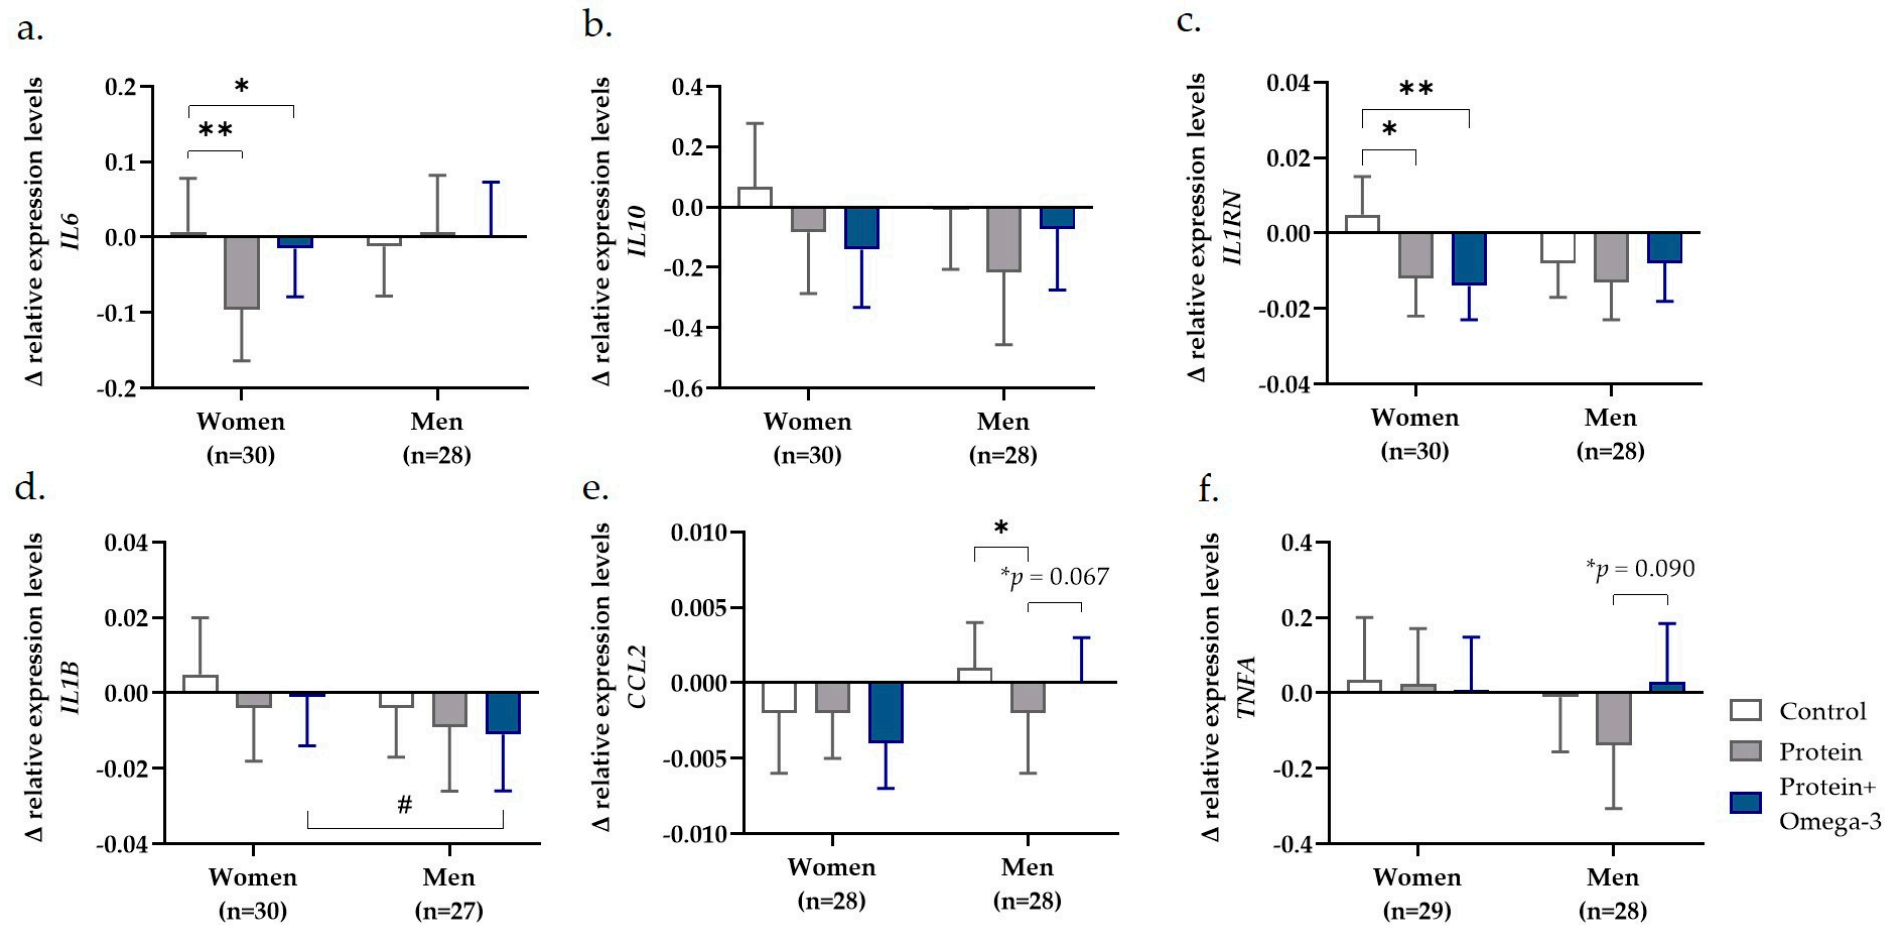

**Figure S2.** Delta ( $\Delta$ ) of gene expression levels of (a) *IL6*, (b) *IL10*, (c) *IL1RN*, (d) *IL1B*, (e) *CCL2*, and (f) *TNFA* presented as estimated mean with 95% confidence interval after eight weeks of control, high-protein (protein) or high-protein, omega-3-enriched (protein + omega-3) diet, displayed separately for women and men. Please note: Changes are shown as absolute values, but have been log-transformed before analyses. \*  $p < 0.05$ , \*\*  $p < 0.01$  obtained from generalized linear mixed models with random effects on subjects, adjusted for age and fat mass index to compare intervention effects within sex. #  $p < 0.05$  obtained from comparisons of group-specific changes between sex with either unpaired t-test or Mann-Whitney U test. *CCL2* c-c motif chemokine ligand-2; *IL* interleukin, *B* beta, *RN* receptor antagonist; *TNFA* tumor necrosis factor- $\alpha$ .

Supplementary figures and tables to:

Haß *et al.*, Effects of exercise and omega-3-supplemented, high-protein diet on inflammatory markers in serum, on gene expression levels in PBMC, and after ex vivo whole-blood LPS stimulation in old adults

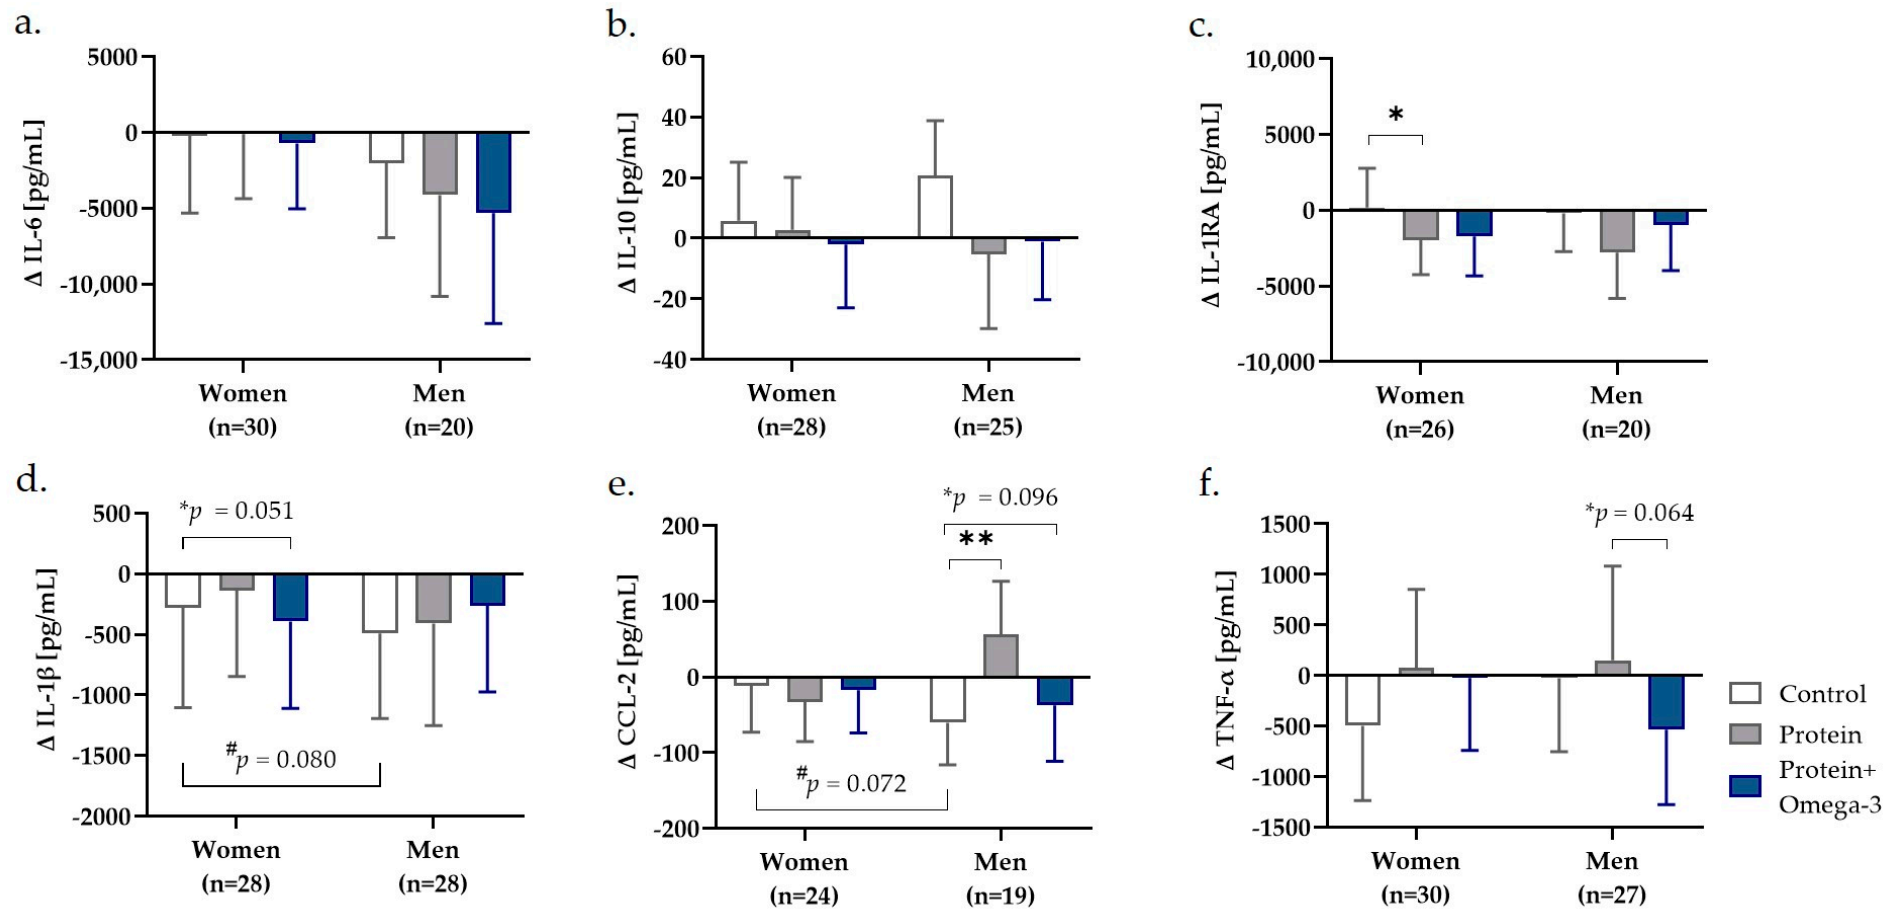

**Figure S3.** Delta ( $\Delta$ ) of ex vivo whole-blood LPS-stimulated concentrations of (a) IL-6, (b) IL-10, (c) IL-1RA, (d) IL-1 $\beta$ , (e) CCL-2, and (f) TNF- $\alpha$  presented as estimated mean with 95% confidence interval after eight weeks of control, high-protein (protein) or high-protein, omega-3-enriched (protein + omega-3) diet, displayed separately for women and men. Please note: Changes are shown as absolute values, but were log-transformed before analyses. \*  $p < 0.05$ , \*\*  $p < 0.01$  obtained from generalized linear mixed models with random effects on subjects, adjusted for age and fat mass index to compare intervention effects within sex. #  $p$  obtained from comparisons of group-specific changes between sex with either unpaired t-test or Mann-Whitney U test. CCL-2 c-c motif chemokine ligand-2; IL interleukin, RA receptor antagonist; TNF- $\alpha$  tumor necrosis factor- $\alpha$ .

Supplementary figures and tables to:

Haß *et al.*, Effects of exercise and omega-3-supplemented, high-protein diet on inflammatory markers in serum, on gene expression levels in PBMC, and after ex vivo whole-blood LPS stimulation in old adults

**Table S1.** Key characteristics compared between women and men at baseline.

|                                                    | Women (n=32)  | Men (n=29)    | p-value |
|----------------------------------------------------|---------------|---------------|---------|
| Age [years]                                        | 68.0 ± 2.2    | 72.9 ± 5.9    | 0.003   |
| Waist/height ratio                                 | 0.58 ± 0.05   | 0.61 ± 0.06   | 0.064   |
| Body mass index [kg/m <sup>2</sup> ]               | 26.8 ± 2.3    | 28.1 ± 2.8    | 0.033   |
| Fat mass index [kg/m <sup>2</sup> ]                | 10.1 ± 1.7    | 7.7 ± 2.1     | <0.001  |
| Serum concentrations                               |               |               |         |
| IL-6 (pg/mL)                                       | 2.39 (1.07)   | 3.19 (1.93)   | 0.011   |
| IL-10 (pg/mL)                                      | 7.75 (3.14)   | 9.43 (4.89)   | 0.038   |
| IL-6/IL-10 ratio                                   | 0.37 ± 0.21   | 0.41 ± 0.23   | 0.474   |
| IL-1RA (pg/mL)                                     | 868 ± 440     | 985 ± 432     | 0.428   |
| HMGB-1 (ng/mL)                                     | 0.23 (0.77)   | 0.36 (1.28)   | 0.492   |
| CCL-2 (pg/mL)                                      | 220 ± 75      | 232 ± 78      | 0.162   |
| Gene expression levels in PBMC                     |               |               |         |
| <i>IL6</i>                                         | 0.046 (0.048) | 0.033 (0.046) | 0.182   |
| <i>IL10</i>                                        | 0.142 (0.155) | 0.243 (0.224) | 0.168   |
| <i>IL1RN</i>                                       | 0.048 ± 0.011 | 0.052 ± 0.015 | 0.647   |
| <i>IL1B</i>                                        | 0.035 (0.012) | 0.042 (0.018) | 0.214   |
| <i>CCL2</i>                                        | 0.006 (0.004) | 0.005 (0.004) | 0.384   |
| <i>TNFA</i>                                        | 0.614 ± 0.207 | 0.642 ± 0.237 | 0.811   |
| LPS-induced concentrations in whole-blood cultures |               |               |         |
| IL-6 (pg/mL)                                       | 6002 (3862)   | 12,060 (3200) | 0.010   |
| IL-10 (pg/mL)                                      | 4.08 ± 2.72   | 3.37 ± 2.38   | 0.573   |
| IL-1RA (pg/mL)                                     | 5168 (4275)   | 6451 (3513)   | 0.249   |
| IL-1β (pg/mL)                                      | 761 ± 262     | 1113 ± 387    | 0.008   |
| CCL-2 (pg/mL)                                      | 96 (70)       | 153 (93)      | 0.225   |
| TNF-α (pg/mL)                                      | 2333 ± 1020   | 3583 ± 1024   | <0.001  |

Continuous variables are expressed as mean ± standard deviation or median (interquartile range). *p*-value obtained from either t-test or Mann-Whitney U test. CCL-2/CCL2 c-c motif chemokine ligand-2; IL interleukin, β/B beta, RA/RN receptor antagonist; HMGB-1 high-mobility group box-1; LPS lipopolysaccharide; PBMC peripheral blood mononuclear cell; TNF-α/TNFA tumor necrosis factor-α.

Supplementary figures and tables to:

Haß *et al.*, Effects of exercise and omega-3-supplemented, high-protein diet on inflammatory markers in serum, on gene expression levels in PBMC, and after ex vivo whole-blood LPS stimulation in old adults

**Table S2.** Primers used for gene expression analysis by qPCR.

| Gene name    |         | Primer sequence (5' → 3')       |
|--------------|---------|---------------------------------|
| <i>B2M</i>   | forward | CTA TCC AGC GTA CTC CAA AG      |
|              | reverse | AAA CCC AGA CAC ATA GCA AT      |
| <i>CCL2</i>  | forward | CAT AGC AGC CAC CTT CAT TCC     |
|              | reverse | TCT GCA CTG AGA TCT TCC TAT TGG |
| <i>IL6</i>   | forward | AGC CCT GAG AAA GGA GAC ATG TA  |
|              | reverse | TCT GCC AGT GCC TCT TTG CT      |
| <i>IL10</i>  | forward | ACG GCG CTG TCA TCG ATT         |
|              | reverse | GGC ATT CTT CAC CTG CTC CA      |
| <i>IL1B</i>  | forward | GCA ATG AGG ATG ACT TGT TCT TTG |
|              | reverse | CAG AGG TCC AGG TCC TGG AA      |
| <i>IL1RN</i> | forward | ACC TCC CTC ATG GAC TGG TCT T   |
|              | reverse | CTT CCT CCC TCA TTC CAC CTT C   |
| <i>TNFA</i>  | forward | GGA CCT CTC TCT AAT CAG CCC TC  |
|              | reverse | TCG AGA AGA TGA TCT GAC TGC C   |

*B2M* beta-2-microglobulin (housekeeping gene); *CCL2* c-c motif chemokine ligand-2; *IL* interleukin, *B* beta, *RN* receptor antagonist; *TNFA* tumor necrosis factor- $\alpha$ .
